# Supplementary material
Source: Springer Nature journal article supplement (https://www.springermedizin.de/resource/supplementary/12885_2009_1629_MOESM4_ESM.pdf/9472502)
Supplement: MOESM4 [file 9472502]

Sexual interest / drive

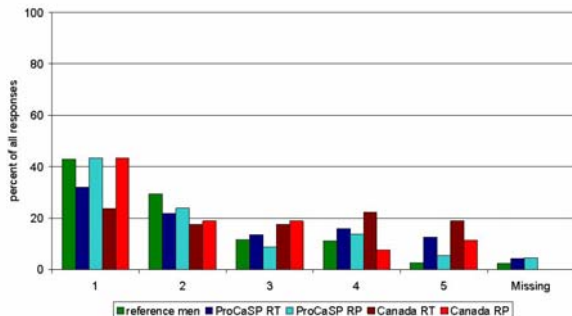

1. Normal amount of sexual drive and interest for you.
2. A little decrease of sexual drive or interest for you.
3. Moderate decrease of sexual drive or interest for you.
4. Substantial decrease of sexual drive or interest for you.
5. No sexual drive or interest.

Bowel problems

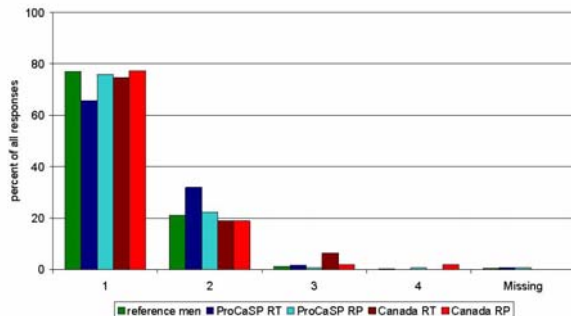

1. No diarrhoea, rectal discomfort, or constipation.
2. Occasionally have diarrhoea, rectal discomfort, or constipation.
3. Frequently have diarrhoea, rectal discomfort, or constipation
4. Nearly always have diarrhoea, rectal discomfort, or constipation.
